# Supplementary material for: Understanding the self-templating of hierarchically porous carbon electrocatalysts using Group 2 coordination polymers
Source: Royal Society of Chemistry journal article supplement (doi:10.1039/d0ma00084a), 2020-01-01
Supplement: d0ma00084a1.pdf [file d0ma00084a1.pdf]

## Supporting info

### Understanding the self-templating of hierarchically porous carbon electrocatalysts using Group 2 coordination polymers

Eliyahu M. Farber,<sup>a</sup> Kasinath Ojha,<sup>a</sup> Tomer Y. Burshtein,<sup>a</sup> Lihi Hasson, and David Eisenberg<sup>\*a</sup>

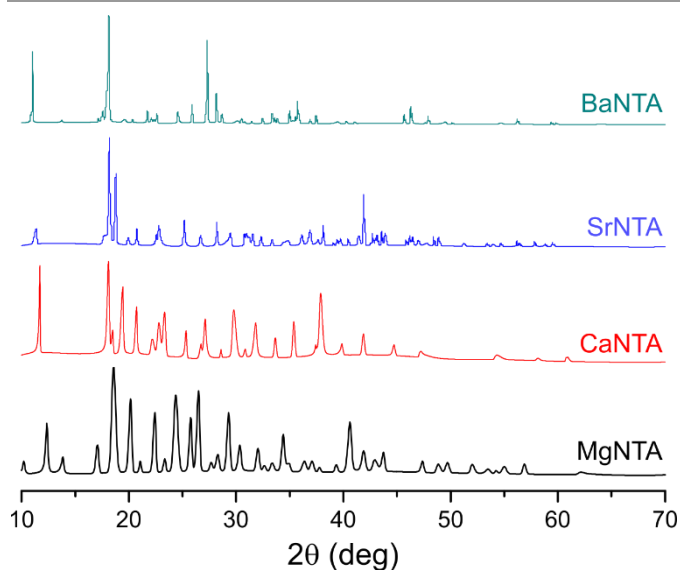

Figure S1: Powder X-ray diffractograms of the Group 2 MOCPs (M-NTA). The patterns are not matched by any reported structures of alkaline earth metal coordination polymers, nor by any of the synthesis precursors.

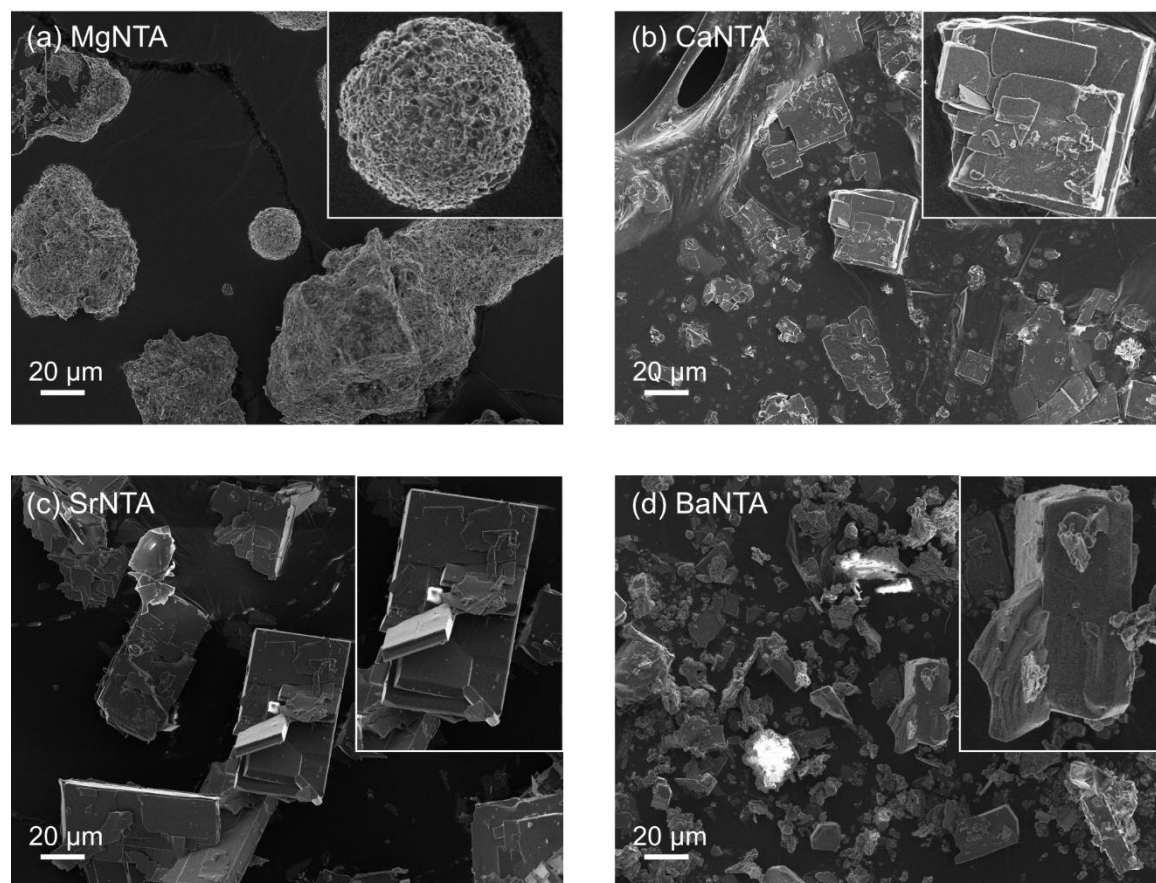

Figure S2: Low magnification SEM of the crystalline powders of the four Group 2 MOCs (M-NTA). The insets show single, representative particles.

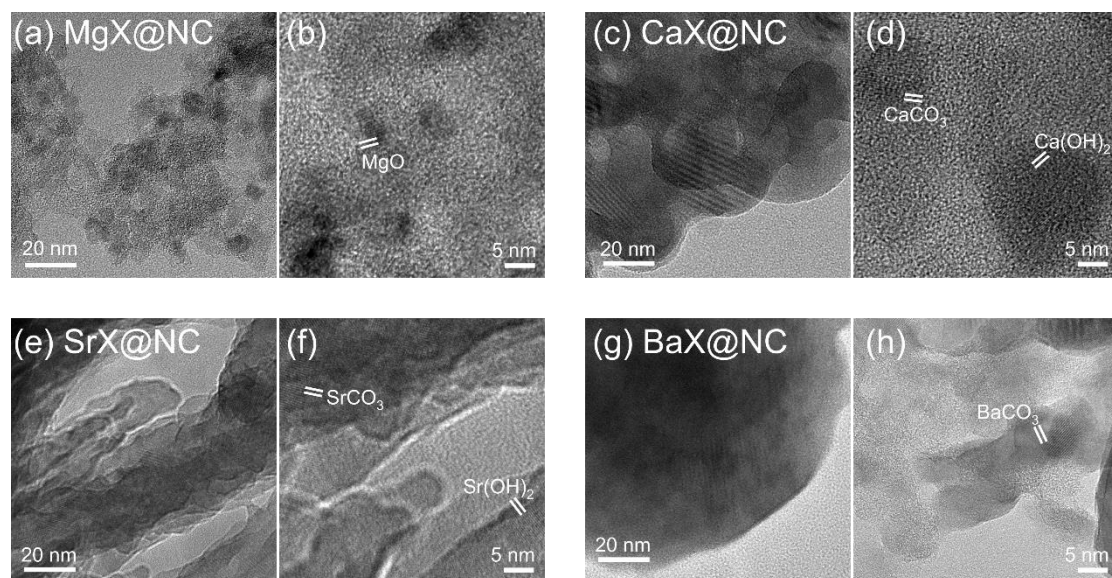

Figure S3: Additional transmission electron micrographs of MX@NC composites.

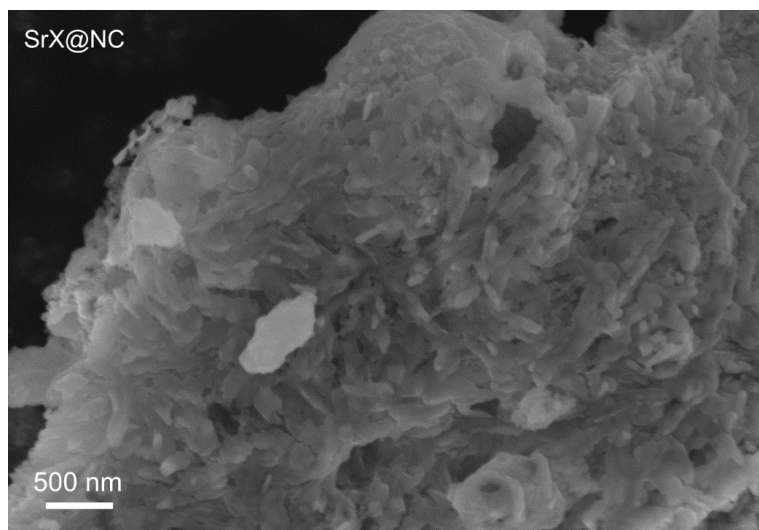

Figure S4: HRSEM of SrX@NC, showing the agglomeration of elongated crystallites in one region.

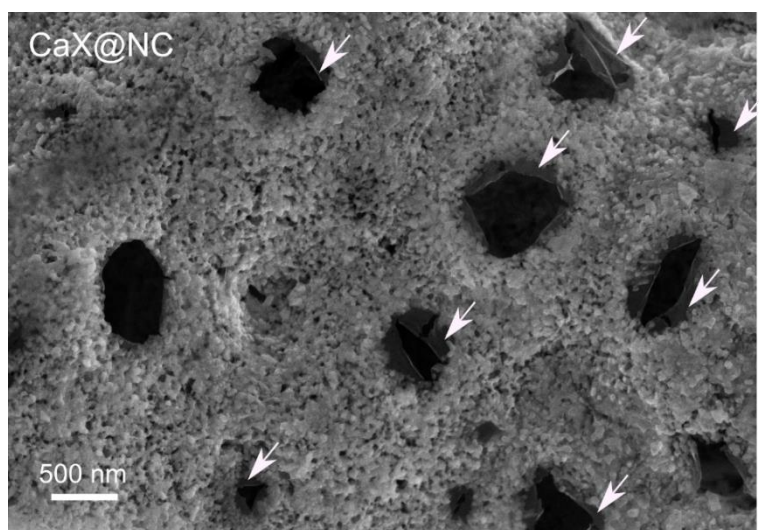

Figure S5: HRSEM of CaX@NC, with arrows marking translucent films at the edges of pores.

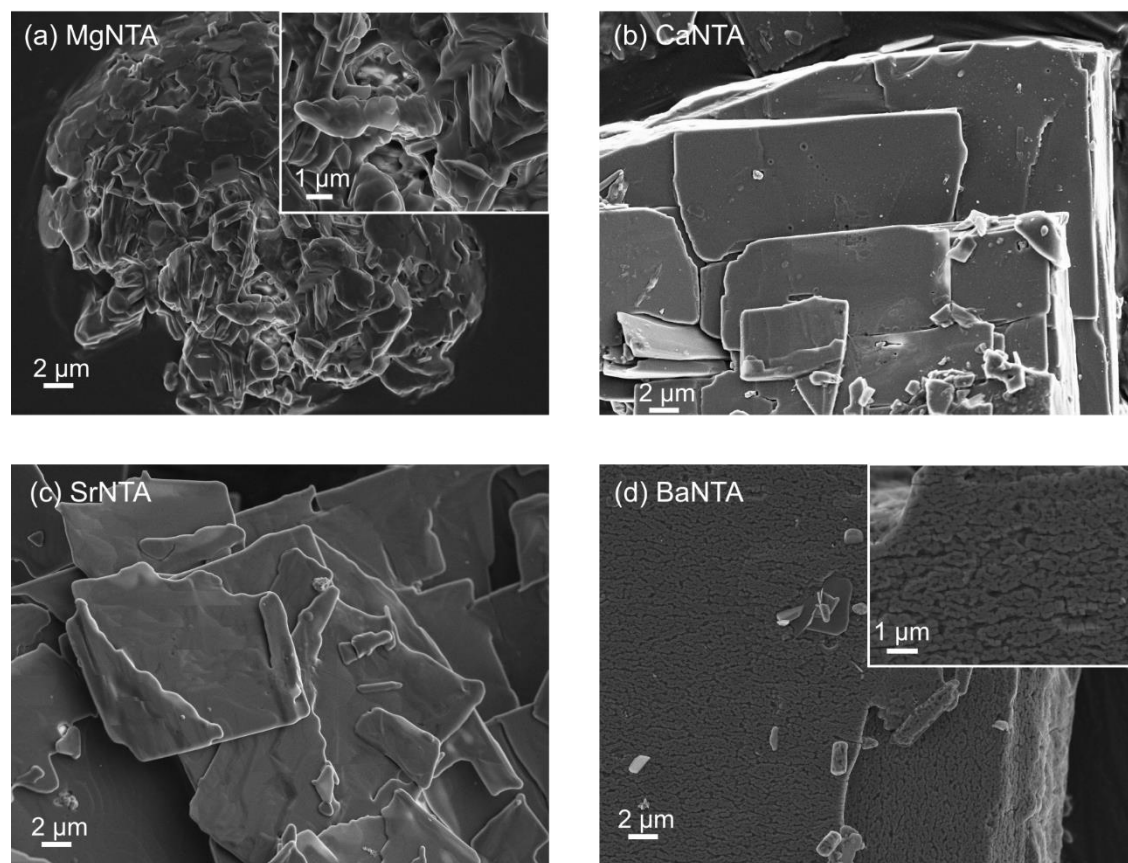

Figure S6: Additional HRSEM micrographs of M-NTA crystallites.

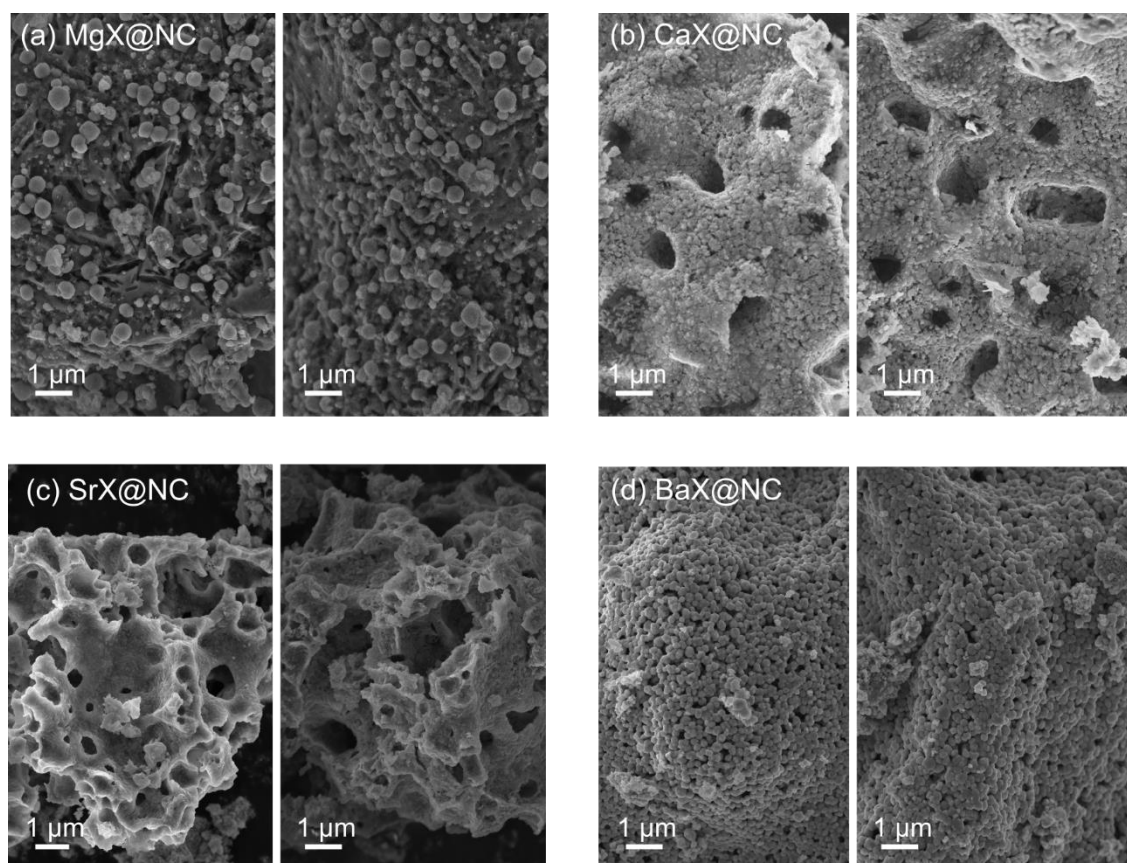

Figure S7: Additional HRSEM micrographs of MX@NC composites.

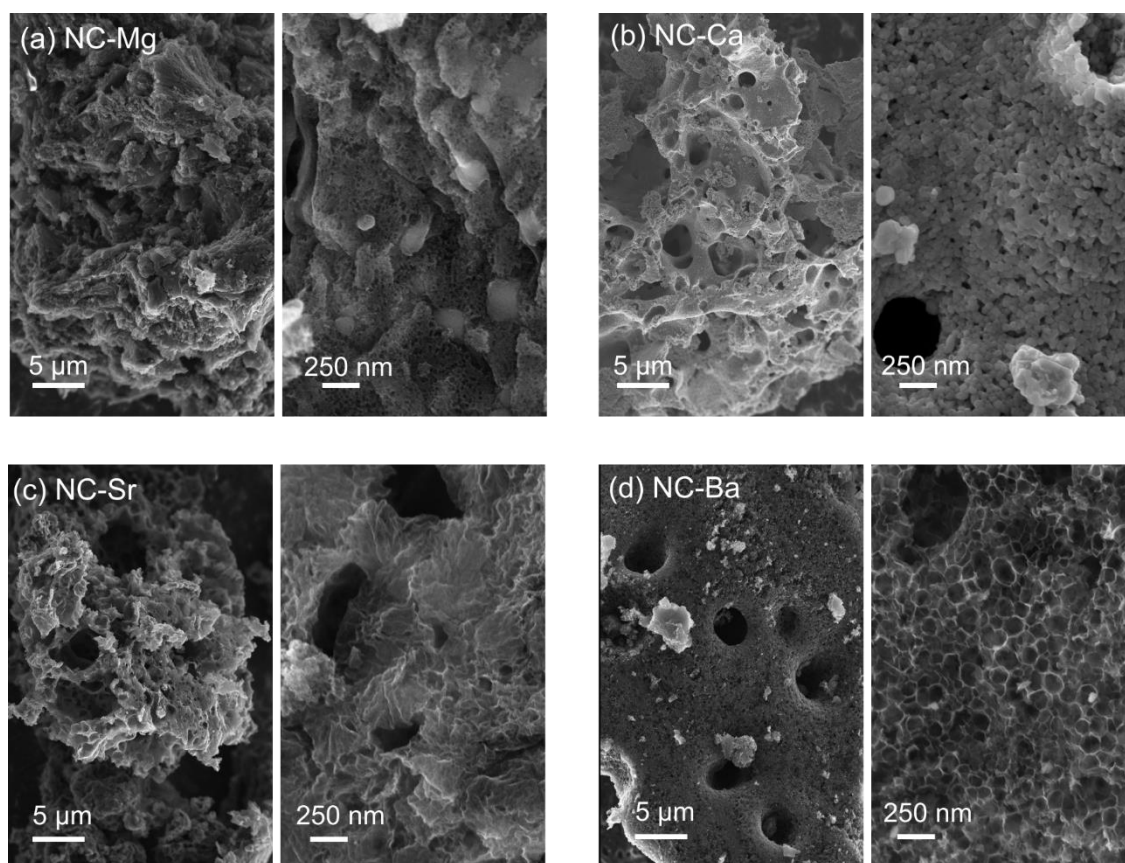

Figure S8: Additional HRSEM micrographs of NC-M carbons.

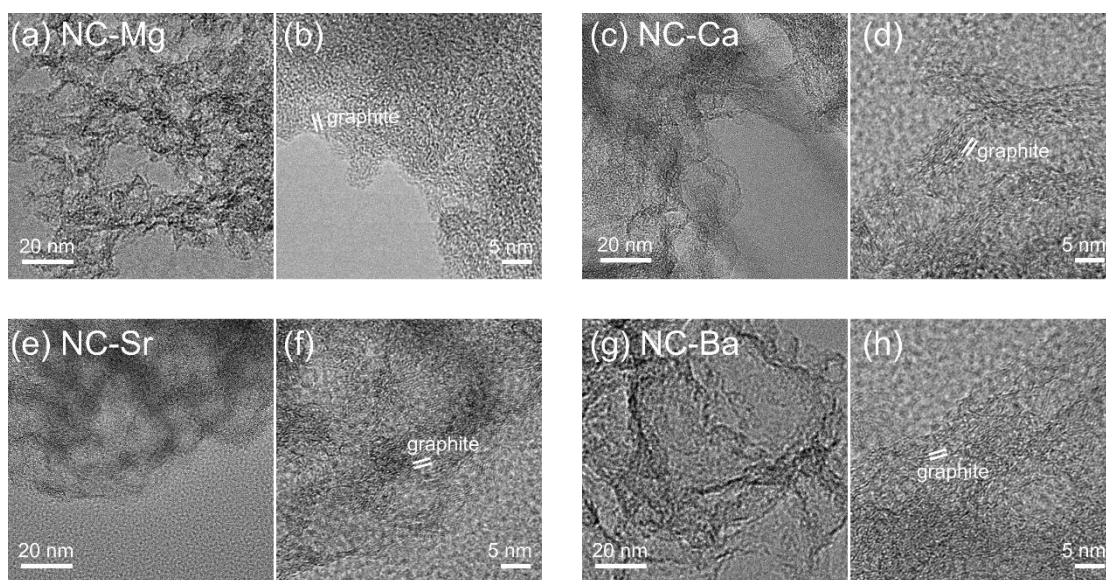

Figure S9: Transmission electron micrographs of NC-M carbons.

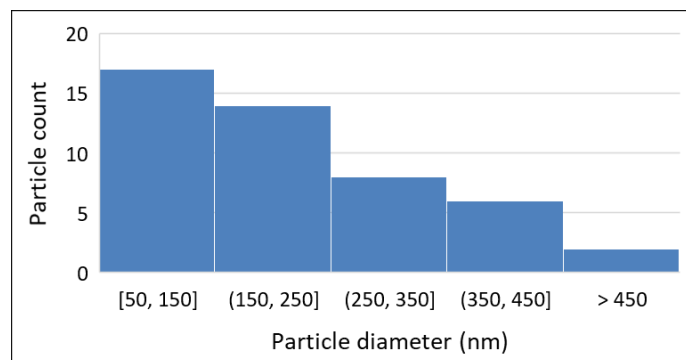

Figure S10: Particle size distribution of MgO in MgX@NC, by image analysis of representative micrographs.

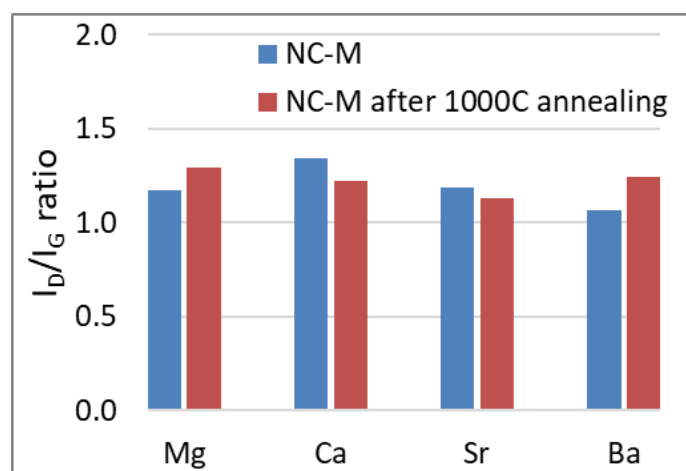

Figure S11: Raman  $I_D/I_G$  ratios for the NC-M carbons.

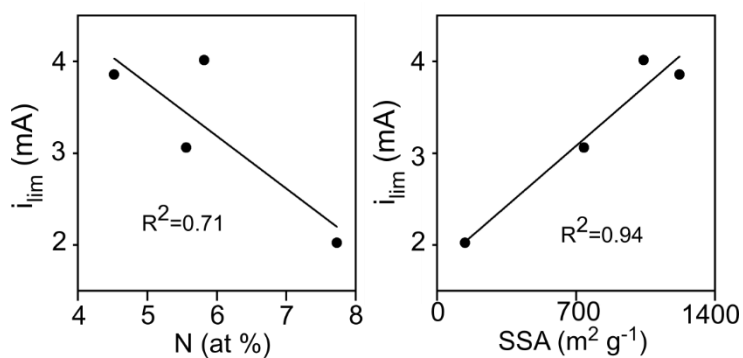

Figure S12: Limiting current vs N at% and vs SSA. Neither is as good a fit as vs the multiplicity of the two, as seen in the paper.

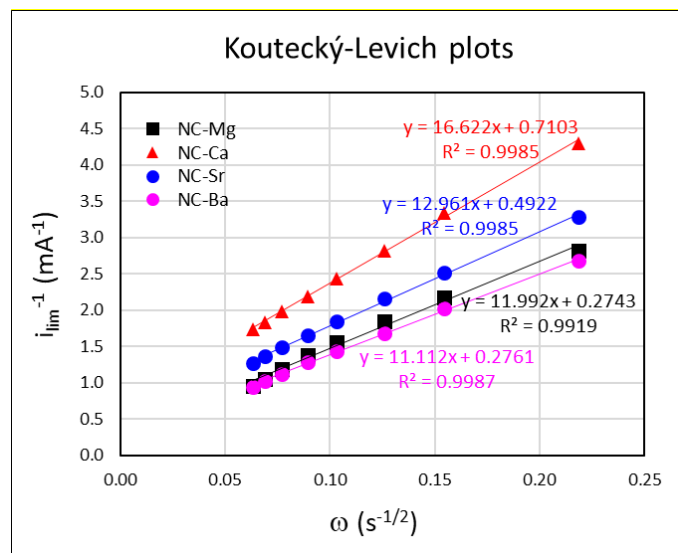

Figure S13: Koutecký-Levich plot for the NC-M carbons at 0.7 V vs. RHE, performed on an RDE at rotation rates of 200–2400 rpm.

Table S1. Results of Koutecký-Levich analysis of  $n$  (number of electrons transferred per  $O_2$  molecule) for the NC-M carbons at 0.7 V vs. RHE.

|       | $n$  |
|-------|------|
| NC-Mg | 3.85 |
| NC Ca | 2.78 |
| NC-Sr | 3.56 |
| NC-Ba | 4.15 |
